# Supplementary material for: In situ catalytic formation of graphene-like graphitic layer decoration on Na3V2−xGax(PO4)3 (0 ≤ x ≤ 0.6) for ultrafast and high energy sodium storage
Source: Royal Society of Chemistry journal article supplement (doi:10.1039/c8ta11890f), 2019-01-01
Supplement: c8ta11890f1.pdf [file c8ta11890f1.pdf]

# Supporting Information

**In-situ catalytic formation of graphene-like graphitic layer  
decoration on  $\text{Na}_3\text{V}_{2-x}\text{Ga}_x(\text{PO}_4)_3$  ( $0 \leq x \leq 0.6$ ) for ultrafast and high  
energy sodium storage**

Qiao Hu, Jia-Ying Liao, Xiao-Dong He, Shuo Wang, Li-Na Xiao, Xiang Ding, Chun-  
Hua Chen\*

*CAS Key Laboratory of Materials for Energy Conversions, Department of Materials  
Science and Engineering & Collaborative Innovation Center of Suzhou Nano Science  
and Technology, University of Science and Technology of China, Anhui Hefei 230026,  
China*

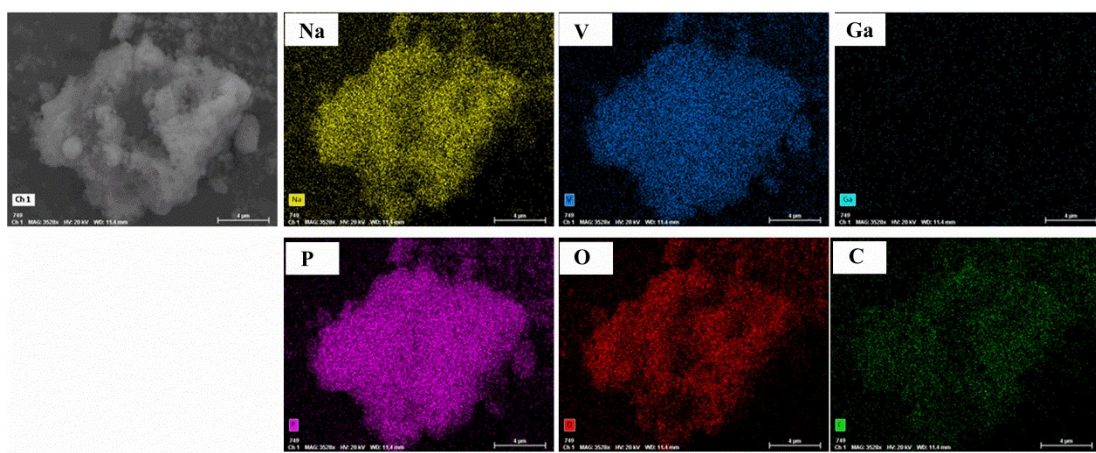

**Fig. S1** Typical SEM image of  $\text{Na}_3\text{V}_2(\text{PO}_4)_3$  and corresponding elemental mapping of sodium (yellow), vanadium (blue), gallium (cyan), phosphorous (plum), oxygen (red), and carbon (green) (i).

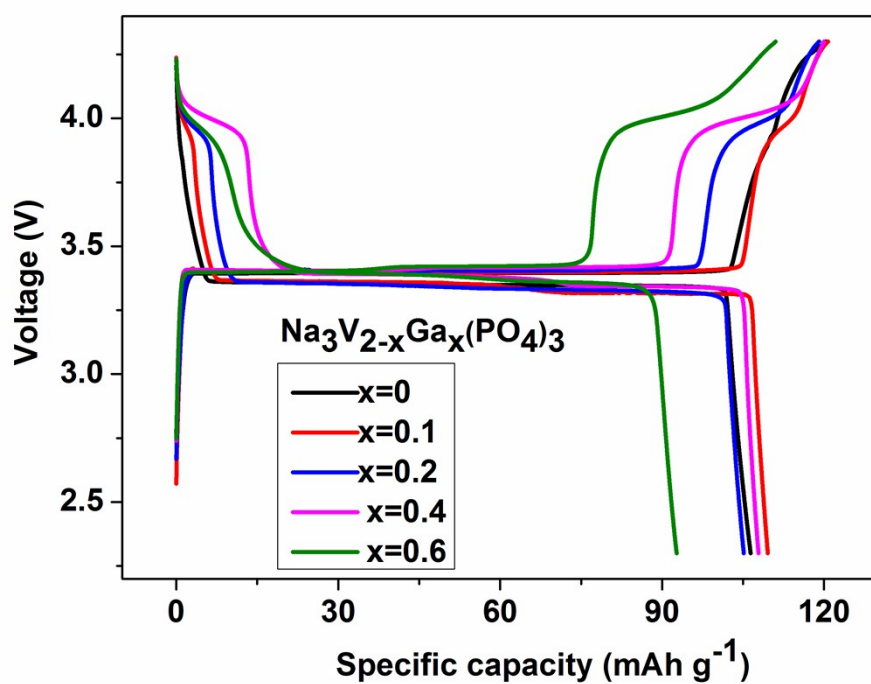

**Fig. S2** The initial charge-discharge curves in the voltage range of 2.3-4.3 V for  $\text{Na}_3\text{V}_{2-x}\text{Ga}_x(\text{PO}_4)_3$  ( $x = 0, 0.1, 0.2, 0.4$  and  $0.6$ ) at  $0.1 \text{ C}$ .

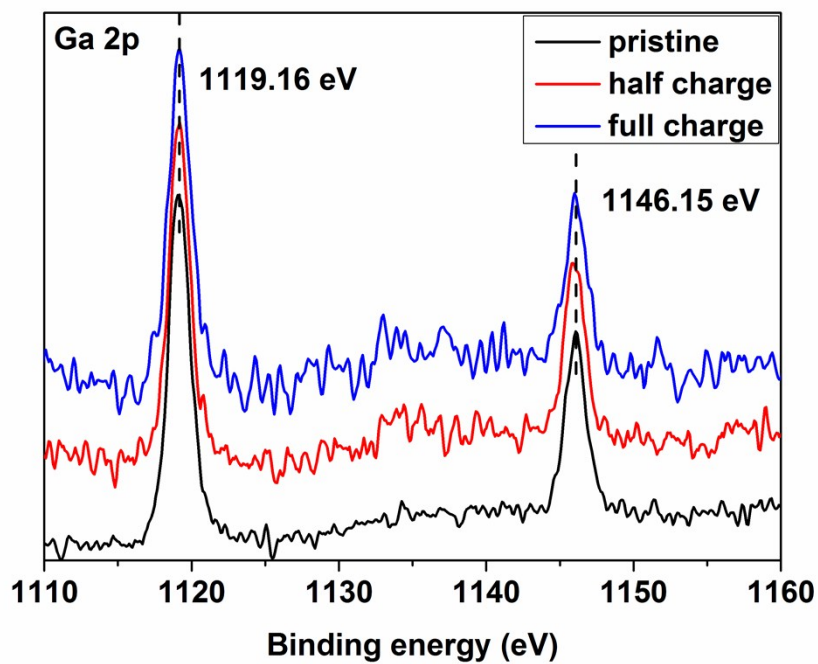

**Fig. S3** Ex-situ XPS of  $\text{Na}_3\text{V}_{1.6}\text{Ga}_{0.4}(\text{PO}_4)_3$  at different charge states.

Table S1 ICP-AES results of  $\text{Na}_3\text{V}_2(\text{PO}_4)_3$  and  $\text{Na}_3\text{V}_{1.6}\text{Ga}_{0.4}(\text{PO}_4)_3$  samples.

| Samples                                                   | Na   | V   | Ga   | P    |
|-----------------------------------------------------------|------|-----|------|------|
| $\text{Na}_3\text{V}_2(\text{PO}_4)_3$                    | 3.02 | 2.0 | 0    | 3.0  |
| $\text{Na}_3\text{V}_{1.6}\text{Ga}_{0.4}(\text{PO}_4)_3$ | 3.02 | 1.6 | 0.42 | 3.06 |

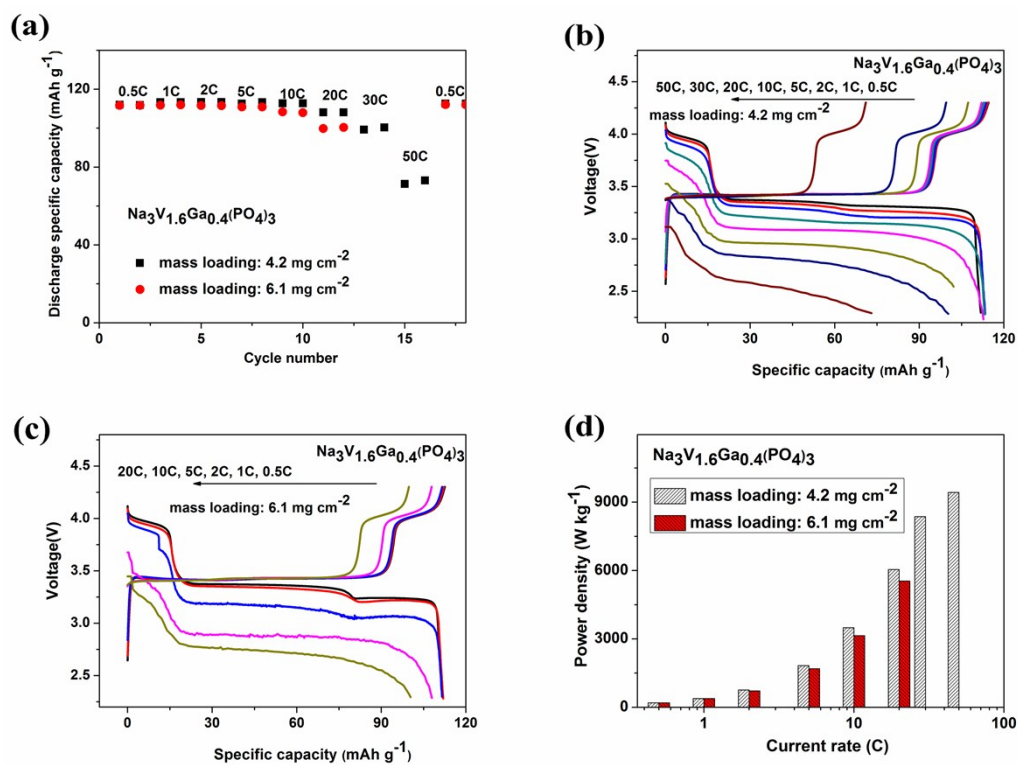

**Fig. S4** The rate performances of Na<sub>3</sub>V<sub>1.6</sub>Ga<sub>0.4</sub>(PO<sub>4</sub>)<sub>3</sub> with higher mass loadings in the voltage of 2.3-4.3 V (a). The charge-discharge curves of Na<sub>3</sub>V<sub>1.6</sub>Ga<sub>0.4</sub>(PO<sub>4</sub>)<sub>3</sub> at different current rates (b, c). The comparison of power density (d) with higher mass loadings (4.2 and 6.1 mg cm<sup>-2</sup>) at different current rates.
